# Supplementary material for: What Do They Know? Comparing Public Knowledge and Opinions about Rodent Management to the Expectations of Pest Controllers
Source: MDPI journal article supplement (doi:10.3390/ani11123429), 2021-12-01
Supplement: s1 [file s1]

Questionnaire for pest controllers - *English translation of the statements offered.*

| In general, do members of the public know that ...                                                             | Yes No                |                       | How certain are you?<br>(1 = very unsure – 7 absolutely certain) |                       |                       |                       |                       |                       |                       |
|----------------------------------------------------------------------------------------------------------------|-----------------------|-----------------------|------------------------------------------------------------------|-----------------------|-----------------------|-----------------------|-----------------------|-----------------------|-----------------------|
|                                                                                                                |                       |                       | 1                                                                | 2                     | 3                     | 4                     | 5                     | 6                     | 7                     |
| 1.Rats and mice belong to the natural fauna of the Netherlands                                                 | <input type="radio"/> | <input type="radio"/> | <input type="radio"/>                                            | <input type="radio"/> | <input type="radio"/> | <input type="radio"/> | <input type="radio"/> | <input type="radio"/> | <input type="radio"/> |
| 2.Rodents need food, water and a resting place in order to survive                                             | <input type="radio"/> | <input type="radio"/> | <input type="radio"/>                                            | <input type="radio"/> | <input type="radio"/> | <input type="radio"/> | <input type="radio"/> | <input type="radio"/> | <input type="radio"/> |
| 3.You can prevent rodents from entering buildings by sealing cracks and holes in the walls.                    | <input type="radio"/> | <input type="radio"/> | <input type="radio"/>                                            | <input type="radio"/> | <input type="radio"/> | <input type="radio"/> | <input type="radio"/> | <input type="radio"/> | <input type="radio"/> |
| 4.Having climbing plants growing up the exterior walls makes it easier for rodents to enter buildings          | <input type="radio"/> | <input type="radio"/> | <input type="radio"/>                                            | <input type="radio"/> | <input type="radio"/> | <input type="radio"/> | <input type="radio"/> | <input type="radio"/> | <input type="radio"/> |
| 5.Excluding rodents from buildings by preventive technical measures is preferable to using poison              | <input type="radio"/> | <input type="radio"/> | <input type="radio"/>                                            | <input type="radio"/> | <input type="radio"/> | <input type="radio"/> | <input type="radio"/> | <input type="radio"/> | <input type="radio"/> |
| 6.Food should be stored in containers with sealed lids                                                         | <input type="radio"/> | <input type="radio"/> | <input type="radio"/>                                            | <input type="radio"/> | <input type="radio"/> | <input type="radio"/> | <input type="radio"/> | <input type="radio"/> | <input type="radio"/> |
| 7.Rodent nuisance can be prevented by making sure that no food or rubbish is left out                          | <input type="radio"/> | <input type="radio"/> | <input type="radio"/>                                            | <input type="radio"/> | <input type="radio"/> | <input type="radio"/> | <input type="radio"/> | <input type="radio"/> | <input type="radio"/> |
| 8.In cases of severe infestation it may be necessary to cull the animals with traps or poison                  | <input type="radio"/> | <input type="radio"/> | <input type="radio"/>                                            | <input type="radio"/> | <input type="radio"/> | <input type="radio"/> | <input type="radio"/> | <input type="radio"/> | <input type="radio"/> |
| 9.Government approved rat and mouse poisons can be identified by a number followed by N or NL on the label     | <input type="radio"/> | <input type="radio"/> | <input type="radio"/>                                            | <input type="radio"/> | <input type="radio"/> | <input type="radio"/> | <input type="radio"/> | <input type="radio"/> | <input type="radio"/> |
| In general, is the public of the opinion that ...                                                              | Yes No                |                       | How certain are you?<br>(1 = very unsure – 7 absolutely certain) |                       |                       |                       |                       |                       |                       |
|                                                                                                                |                       |                       | 1                                                                | 2                     | 3                     | 4                     | 5                     | 6                     | 7                     |
| 10.If it is necessary to kill rodents because they are causing a nuisance, this should be done in a humane way | <input type="radio"/> | <input type="radio"/> | <input type="radio"/>                                            | <input type="radio"/> | <input type="radio"/> | <input type="radio"/> | <input type="radio"/> | <input type="radio"/> | <input type="radio"/> |
| 11.Using traps is preferable to using poison because there is less risk of spreading poison in the environment | <input type="radio"/> | <input type="radio"/> | <input type="radio"/>                                            | <input type="radio"/> | <input type="radio"/> | <input type="radio"/> | <input type="radio"/> | <input type="radio"/> | <input type="radio"/> |
| 12.If they were to experience rodent nuisance, they know where to get advice                                   | <input type="radio"/> | <input type="radio"/> | <input type="radio"/>                                            | <input type="radio"/> | <input type="radio"/> | <input type="radio"/> | <input type="radio"/> | <input type="radio"/> | <input type="radio"/> |
| 13.If they were to experience rodent nuisance, they would engage a specialist company                          | <input type="radio"/> | <input type="radio"/> | <input type="radio"/>                                            | <input type="radio"/> | <input type="radio"/> | <input type="radio"/> | <input type="radio"/> | <input type="radio"/> | <input type="radio"/> |
| 14.If they were to experience rodent nuisance, they would contact the local authority                          | <input type="radio"/> | <input type="radio"/> | <input type="radio"/>                                            | <input type="radio"/> | <input type="radio"/> | <input type="radio"/> | <input type="radio"/> | <input type="radio"/> | <input type="radio"/> |
